# Supplementary material for: Oxidation of protein disulfide bonds by singlet oxygen gives rise to glutathionylated proteins
Source: PubMed Central journal article supplement — Redox Biol. 2020 Dec 1;38:101822. doi: 10.1016/j.redox.2020.101822 (PMC7750407; doi:10.1016/j.redox.2020.101822), 2020-12-01
Supplement: mmc1.pdf [file mmc1.pdf]

# **Oxidation of protein disulfide bonds by singlet oxygen gives rise to glutathionylated proteins**

Shuwen Jiang <sup>1</sup>, Luke Carroll <sup>1</sup>, Lars M. Rasmussen <sup>2</sup>, Michael J. Davies <sup>1\*</sup>

<sup>1</sup> Department of Biomedical Sciences, Panum Institute, University of Copenhagen, Copenhagen 2200, Denmark

<sup>2</sup> Center for Individualized Medicine in Arterial Diseases (CIMA), Department of Clinical Biochemistry and Pharmacology, Odense University Hospital, University of Southern Denmark, Odense, Denmark

---

\* Corresponding author. E-mail: [davies@sund.ku.dk](mailto:davies@sund.ku.dk)

## **Supplementary Data**

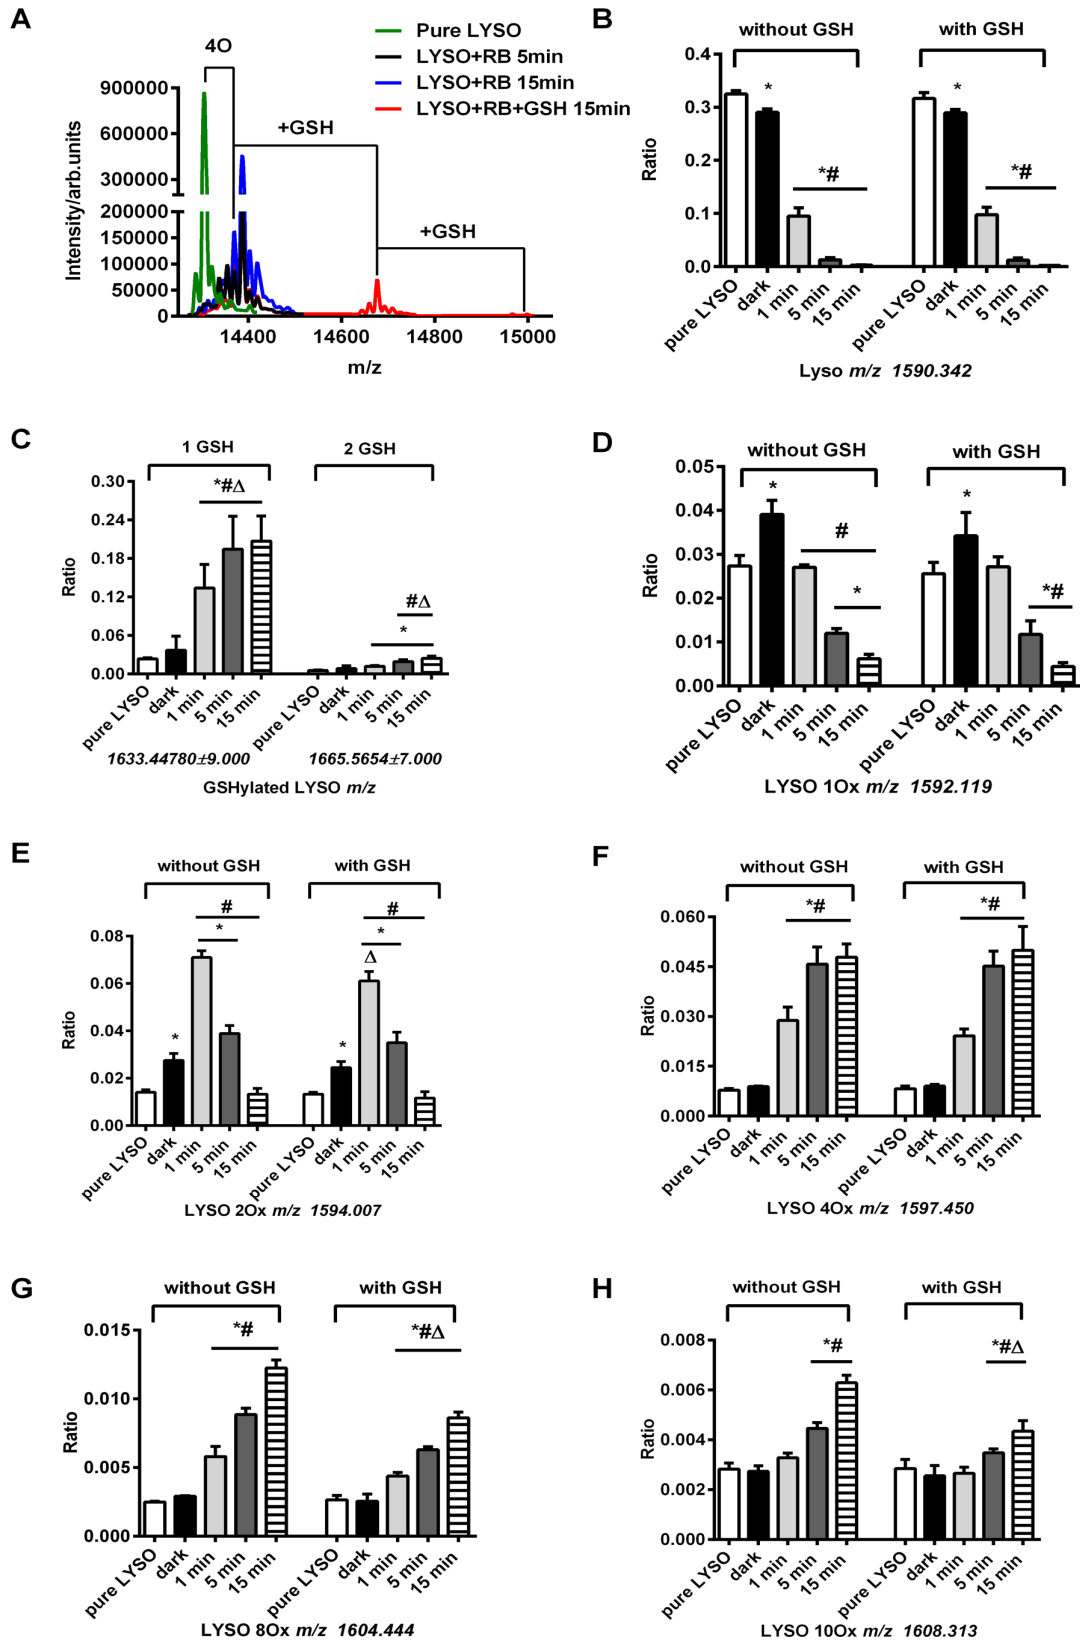

**Supplementary Figure 1.** LC-MS demonstrates incorporation of oxygen into Lyso after photo-oxidation and subsequent glutathionylation. Panel A: Deconvoluted spectrum of Lyso after photolysis and addition of GSH (green line: pure Lyso; black line: photolysis for 5 min; blue line: photolysis for 15 min; red line: glutathionylation of oxidized Lyso after 15 min illumination); Panel B: Ratio of parent Lyso; Panel C: Ratio of glutathionylated Lyso; Panel D: Ratio of oxidized Lyso with 1O incorporation; Panel E: Ratio of oxidized Lyso with 2O incorporation; Panel F: Ratio of oxidized Lyso with 4O incorporation; Panel G: Ratio of oxidized Lyso with 8O incorporation; Panel H: Ratio of oxidized Lyso with 10O incorporation. The  $m/z$  ion ratio is calculated by taking the sum of the signal of detected species and dividing by the total signal of protein envelope in the mass spectrum. Statistical differences are indicated as follows: \*P < 0.05 vs. native Lyso (CON); #P < 0.05 vs. dark samples (0 min);  $\Delta$ P < 0.05 vs. samples without addition of GSH. Quantitative data are presented as mean  $\pm$  SD from three independent experiments.

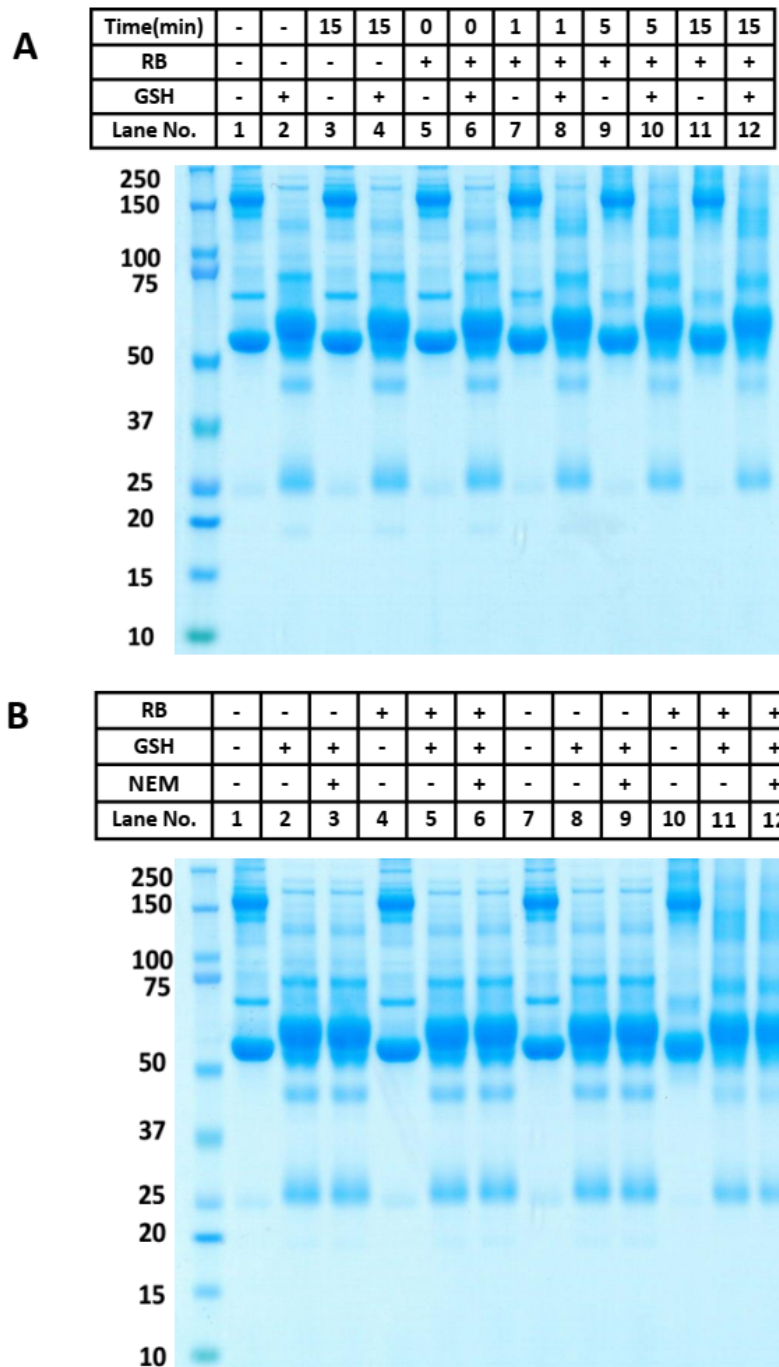

**Supplementary Figure 2.** Plasma proteins exposed to  $^1\text{O}_2$  undergo structural changes. Panel A: Representative SDS-PAGE of plasma ( $2 \text{ mg protein mL}^{-1}$ ) after photo-oxidation and then reaction with GSH. Panel B: Plasma ( $2 \text{ mg protein mL}^{-1}$ ) was pretreated with NEM ( $1 \text{ mM}$ , as indicated) before exposure to  $^1\text{O}_2$  for 15 min and reaction with GSH for 1 h.
